# Supplementary material for: Association between Early Life Child Development and Family Dog Ownership: A Prospective Birth Cohort Study of the Japan Environment and Children’s Study
Source: MDPI journal article supplement (doi:10.3390/ijerph18137082), 2021-07-02
Supplement: s1 [file s1]

**Table S1.** Complete case analysis of child development delays at 3 years of age in association with “never” and “ever” dog ownership.

| ASQ domain      | <i>n</i> | OR (95% CI) |                     |
|-----------------|----------|-------------|---------------------|
|                 |          | Never       | Ever                |
| Communication   | 49,891   | 1.00        | 0.89 (0.78, 1.01)   |
| Gross motor     | 49,950   | 1.00        | 0.85 (0.75, 0.96) * |
| Fine motor      | 49,813   | 1.00        | 0.98 (0.89, 1.07)   |
| Problem-solving | 49,598   | 1.00        | 0.89 (0.80, 0.98) * |
| Personal-social | 49,872   | 1.00        | 0.84 (0.72, 0.97) * |

ASQ-3: Age Stages Questionnaire third edition. Never: Never family dog owner, Ever: ever family dog owner. Adjusted for parity, maternal age at delivery, maternal smoking during pregnancy, maternal education, paternal education, maternal mental health (Short Form-8 mental component score), family income at ASQ-3 completed, child sex, environmental tobacco smoke exposure at 3 years-old, daycare attendance at 3 years-old. \*  $p < 0.050$ , \*\*  $p < 0.010$ .

**Table S2.** Complete case analysis of child development delays at 3 years of age in association with family dog ownership.

| ASQ domain      | <i>n</i> | OR (95% CI)                |                              |                                |                           |
|-----------------|----------|----------------------------|------------------------------|--------------------------------|---------------------------|
|                 |          | Never ( <i>n</i> = 65,986) | Past only ( <i>n</i> = 6745) | Current only ( <i>n</i> = 654) | Always ( <i>n</i> = 5556) |
| Communication   | 49,891   | 1.00                       | 0.91 (0.76, 1.08)            | 0.74 (0.41, 1.32)              | 0.89 (0.74, 1.06)         |
| Gross motor     | 49,950   | 1.00                       | 0.82 (0.69, 0.97) *          | 0.62 (0.34, 1.13)              | 0.91 (0.77, 1.08)         |
| Fine motor      | 49,813   | 1.00                       | 1.00 (0.88, 1.13)            | 0.96 (0.65, 1.41)              | 0.95 (0.83, 1.09)         |
| Problem-solving | 49,598   | 1.00                       | 0.87 (0.76, 0.99) *          | 0.97 (0.66, 1.43)              | 0.90 (0.78, 1.03)         |
| Personal-social | 49,872   | 1.00                       | 0.93 (0.77, 1.13)            | 0.78 (0.41, 1.48)              | 0.74 (0.59, 0.92) **      |

ASQ-3: Age Stages Questionnaire third edition. Never: Never family dog owner, Ever: ever family dog owner. Adjusted for parity, maternal age at delivery, maternal smoking during pregnancy, maternal education, paternal education, maternal mental health (Short Form-8 mental component score), family income at ASQ-3 completed, child sex, environmental tobacco smoke exposure at 3 years-old, daycare attendance at 3 years-old. \*  $p < 0.050$ , \*\*  $p < 0.010$ .
